# Supplementary material for: High-sensitivity and wide-temperature-range dual-mode optical thermometry under dual-wavelength excitation in a novel double perovskite tellurate oxide
Source: Royal Society of Chemistry journal article supplement (doi:10.1039/d1dt01147b), 2021-01-01

## Supplementary Information

High-sensitivity and wide-temperature-range dual-mode optical thermometry under dual-wavelength excitation in novel double perovskite tellurate oxide

Zhaojie Wu, Li Li\*, Guang Tian, Yongjie Wang, Faling Ling, Zhongmin Cao, Sha Jiang, Guotao Xiang, Yanhong Li, Xianju Zhou\*\*

School of Science, Chongqing University of Posts and Telecommunications, Chongqing 400065, P. R. China

\* Corresponding author: [lilic@cqupt.edu.cn](mailto:lilic@cqupt.edu.cn) (L.Li); [zhouxj@cqupt.edu.cn](mailto:zhouxj@cqupt.edu.cn) (X. Zhou)

Table S1 Crystallographic and Rietveld refinement data of SrLaLiTeO<sub>6</sub>: 1.2%Mn<sup>4+</sup>, 0.7%Dy<sup>3+</sup> phosphor

| Formula             | SrLaLiTeO <sub>6</sub> : 1.2%Mn <sup>4+</sup> , 0.7%Dy <sup>3+</sup> |
|---------------------|----------------------------------------------------------------------|
| Space group         | P2 <sub>1</sub> /n - monoclinic                                      |
| Cell parameters     | $a=5.606 \text{ \AA}$                                                |
|                     | $b=5.620 \text{ \AA}$                                                |
|                     | $c=7.930 \text{ \AA}$                                                |
| Reliability factors | $\alpha=90^\circ, \beta=89.8315^\circ, \gamma=90^\circ$              |
|                     | $R_{wp}=8.34\%$                                                      |
|                     | $R_p=5.71\%$                                                         |
|                     | $\chi^2=1.036$                                                       |

Table S2 Atomic coordinates, cation and anion occupancies of SrLaLiTeO<sub>6</sub>: 1.2%Mn<sup>4+</sup>, 0.7%Dy<sup>3+</sup> phosphor

| SrLaLiTeO <sub>6</sub> : 1.2%Mn <sup>4+</sup> , 0.7%Dy <sup>3+</sup> |       |       |        |           |                               |
|----------------------------------------------------------------------|-------|-------|--------|-----------|-------------------------------|
|                                                                      | x     | y     | z      | Occupancy | $U_{\text{iso}}/\text{\AA}^2$ |
| Sr                                                                   | 0.512 | 0.457 | 0.241  | 0.5       | 0.025                         |
| La/Dy                                                                | 0.512 | 0.457 | 0.241  | 0.5       | 0.025                         |
| Li                                                                   | 0.5   | 0     | 0      | 1         | 0.025                         |
| Te/Mn                                                                | 0     | 0.5   | 0      | 1         | 0.025                         |
| O1                                                                   | 0.302 | 0.305 | -0.077 | 1         | 0.025                         |
| O3                                                                   | 0.191 | 0.776 | -0.047 | 1         | 0.025                         |
| O4                                                                   | 0.419 | 0.982 | 0.248  | 1         | 0.02                          |

Fig.S1 The diffuse reflection spectra of SLLT host, SLLT: 1.2% Mn<sup>4+</sup>, and SLLT: 1.2% Mn<sup>4+</sup>, 7% Dy<sup>3+</sup>.

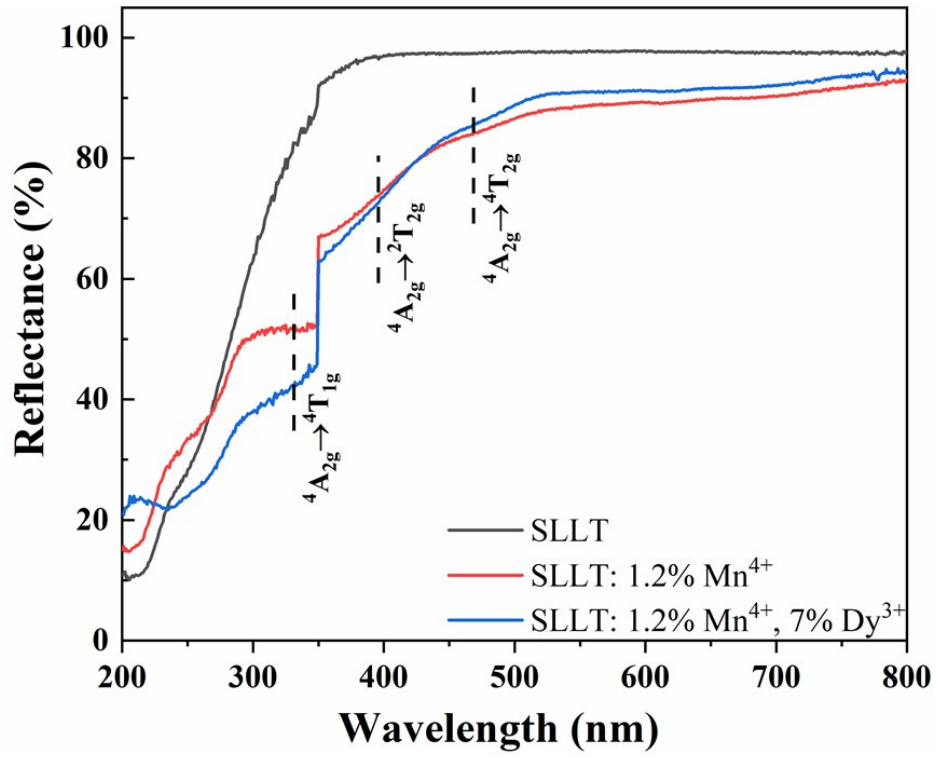

Fig.S2 The quenching mechanism of the  $Mn^{4+}$  in the SLLT host via configurational coordinate diagrams.

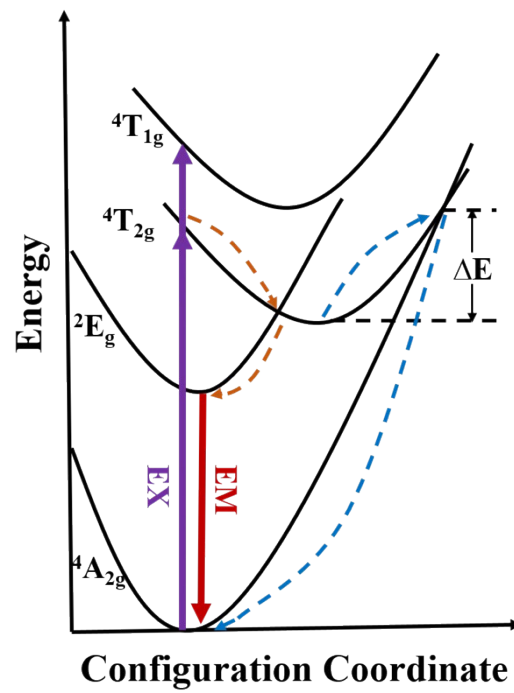

Fig. S3 The temperature resolution  $\delta T$  under 351nm (a) and 453nm excitation (c). The cycling measurement under 351nm (b) and 453nm excitation (d).

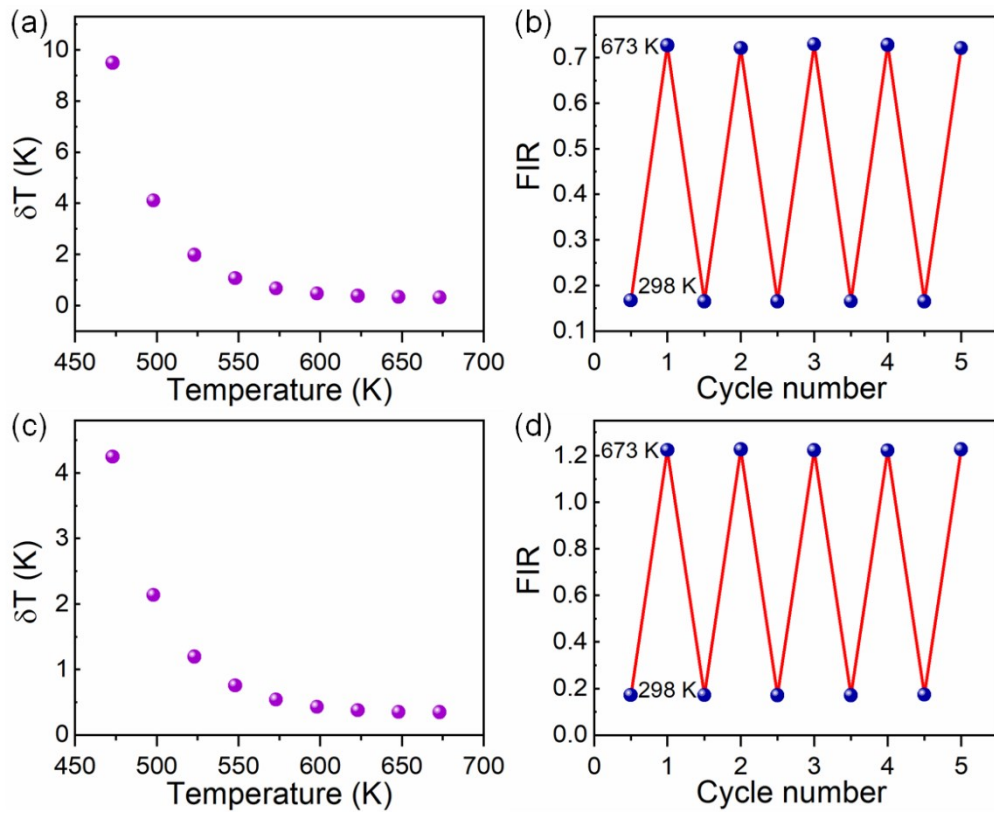

Supplement: d1dt01147b1.pdf [file d1dt01147b1.pdf]
